# Supplementary material for: The majority are not performing home-exercises correctly two weeks after their initial instruction—an assessor-blinded study
Source: PeerJ. 2015 Jul 21;3:e1102. doi: 10.7717/peerj.1102 (PMC4517955; doi:10.7717/peerj.1102)
Supplement: Supplemental Information 1 [file peerj-03-1102-s001.xlsx]

## Sheet: Ark1
set1_baseline	set2_baseline	set3_baseline	total_TUT_baseline	set1_follow-up	set2_follow-up	set3_follow-up	total_TUT_follow-up	Diff between baseline and follow-up in total TUT
81.09	82.87	82.98	246.94	97.91	84.48	84.72	267.11	20.17
84.08	81.83	82.7	248.61	106.07	91.79	96.69	294.55	45.94
89.74	86.77	88.92	265.43	69.88	61.43	65.76	197.07	-68.36
80.04	84.68	84.02	248.74	66.87	74.56	79.66	221.09	-27.65
82.75	83.61	80.11	246.47	90.96	90.86	89.17	270.99	24.52
90.8	88.81	91.29	270.9	66.29	66.09	62.81	195.19	-75.71
94.07	91.43	89.74	275.24	70.4	75.77	78.47	224.64	-50.6
93.73	92.68	92.91	279.32	87.84	94.18	92.68	274.7	-4.62
91.13	90.73	87.02	268.88	89.11	93.82	92.14	275.07	6.19
81.75	78.14	80.8	240.69	83.81	91.14	85.7	260.65	19.96
84.13	82.07	82.86	249.06	73.29	79.48	81.82	234.59	-14.47
81.34	81.49	83.15	245.98	88.74	96.17	92.72	277.63	31.65
89.69	89.1	86.55	265.34	73.92	85.49	82.72	242.13	-23.21
79.78	81.73	82.69	244.2	52.56	53.13	53.9	159.59	-84.61
81.94	85.21	85.62	252.77	79.03	71.31	76.46	226.8	-25.97
84.11	83.55	84.7	252.36	84.94	90.91	88.86	264.71	12.35
89.7	88.86	89.06	267.62	95.52	85.79	84.63	265.94	-1.68
78.4	80.59	81.68	240.67	72.74	83.79	87.03	243.56	2.89
81.27	84.85	85.2	251.32	94.2	87.85	87.7	269.75	18.43
83.21	81.64	85.43	250.28	89.39	94.66	100.14	284.19	33.91
85.56	86.27	84.33	256.16	129.41	123.04	118.37	370.82	114.66
88.44	86.83	88.75	264.02	90.7	91.18	96.25	278.13	14.11
85.22	85.89	83.4	254.51	76.85	70.77	71.5	219.12	-35.39
88.87	88.93	84.63	262.43	106.34	102.02	99.03	307.39	44.96
82.08	83.11	82.05	247.24	76.08	88.1	82.7	246.88	-0.36
80.26	82.59	79.44	242.29	69.86	74.7	71.87	216.43	-25.86
86.78	86.06	87.72	260.56	86.88	95.97	94.3	277.15	16.59
85.13	82.48	83.78	251.39	87.15	86.22	84.5	257.87	6.48
83.41	83.23	83.93	250.57	63.77	63.4	72.82	199.99	-50.58
